# Supplementary material for: Meta‐analysis of genome‐wide association from genomic prediction models
Source: PubMed Central journal article supplement — Anim Genet. 2015 Nov 26;47(1):36–48. doi: 10.1111/age.12378 (PMC4738412; doi:10.1111/age.12378), 2015-11-26

**Figure S3** Comparison of  $P$ -values between heteroskedastic joint analysis and population GWA. Q–Q plot for comparison of  $P$ -values obtained from: a. Joint-analysis ( $x$ -axis) vs GWA in commercial population ( $y$ -axis); b. Joint-analysis ( $x$ -axis) vs GWA in MARC population ( $y$ -axis); c. Joint-analysis ( $x$ -axis) vs GWA in MSUPRP ( $y$ -axis).

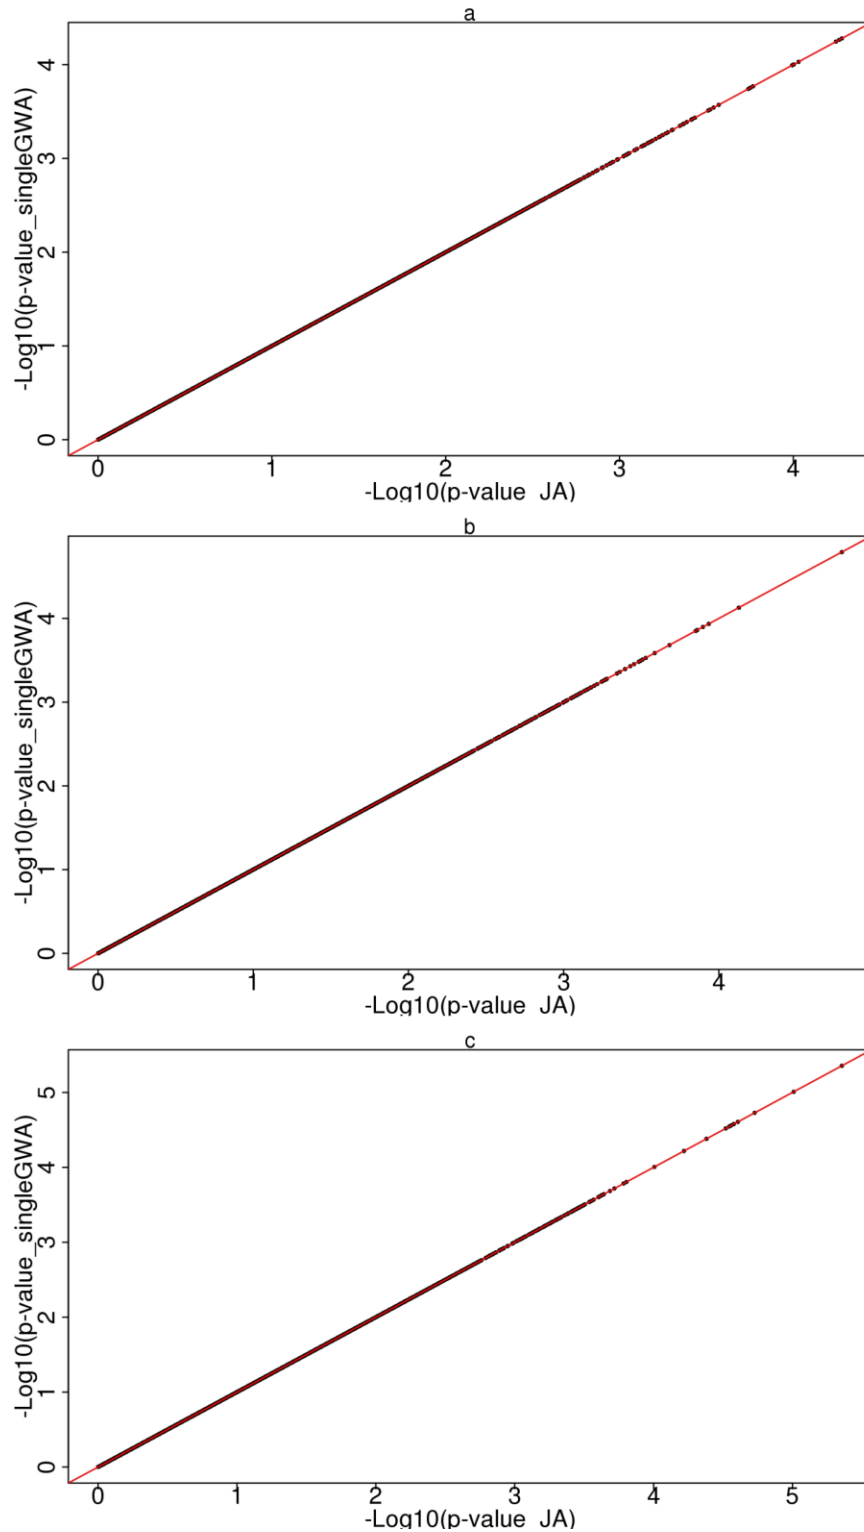

Supplement: AGE-47-36-s003.pdf [file AGE-47-36-s003.pdf]
