# Supplementary material for: Meta‐analysis of genome‐wide association from genomic prediction models
Source: PubMed Central journal article supplement — Anim Genet. 2015 Nov 26;47(1):36–48. doi: 10.1111/age.12378 (PMC4738412; doi:10.1111/age.12378), 2015-11-26

**Figure S4** Manhattan plot for CIE a\* considering false discovery rate 1% for multiple testing correction. Manhattan plot for CIE a\* considering estimated  $q$ -values  $<0.01$  on the  $P$ -values resulting from MA-GWA using: a. Sample size weights; b. Inverse variance weights.  $-\text{Log}_{10}(\text{p-value})$  (y-axis) versus absolute SNP position in Megabases (x-axis); Horizontal line marks the significance threshold according to false discovery rate 1%.

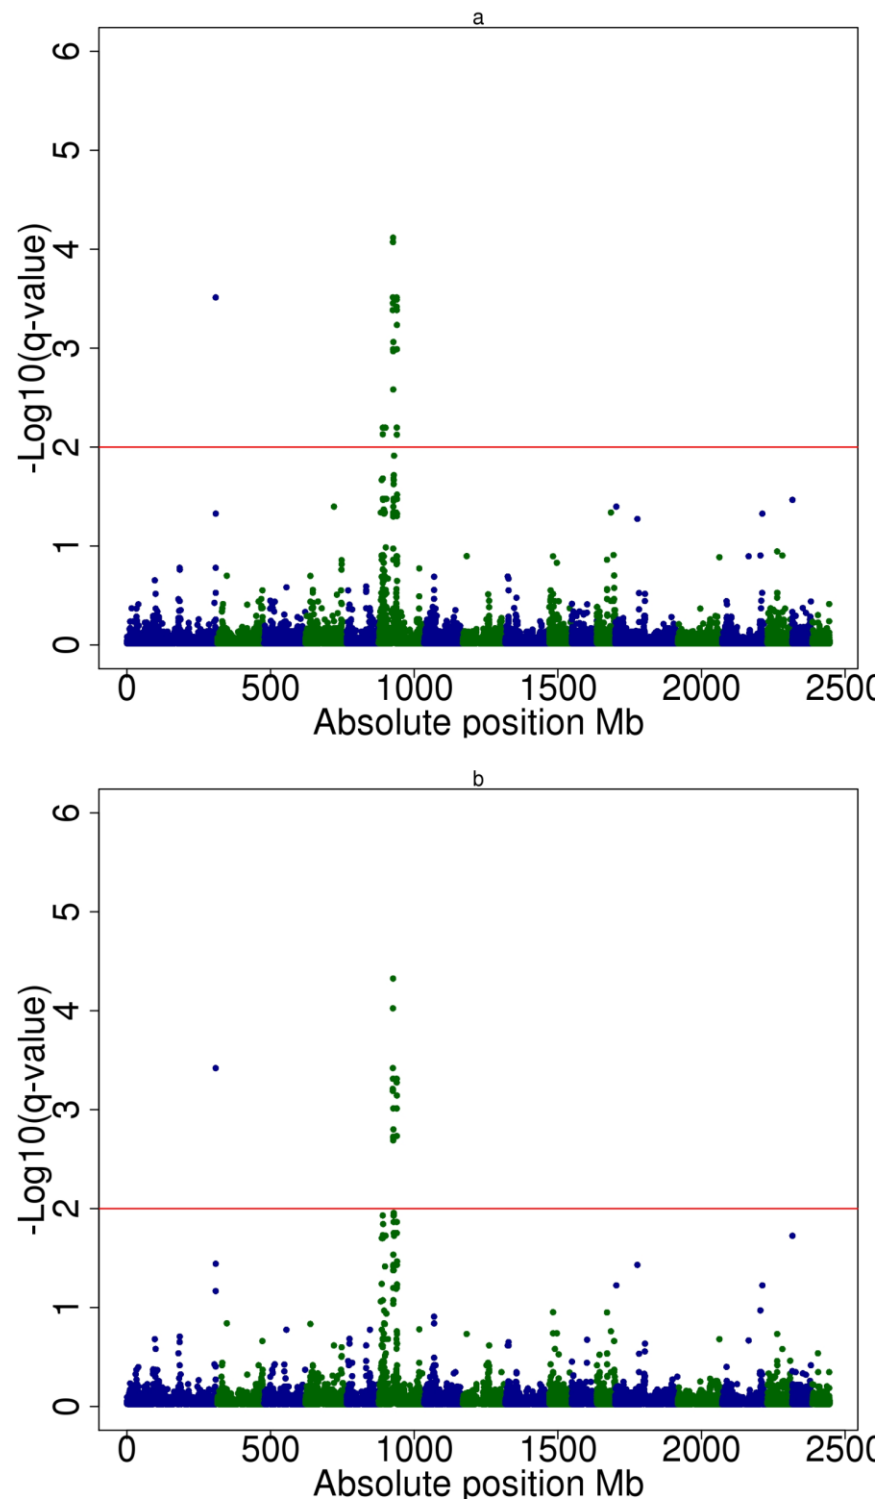

Supplement: AGE-47-36-s004.pdf [file AGE-47-36-s004.pdf]
